# Supplementary material for: The Effect of Neutral Salt and Alkaline Stress with the Same Na+ Concentration on Root Growth of Soybean (Glycine max (L.) Merr.) Seedlings
Source: MDPI journal article supplement (doi:10.3390/agronomy12112708), 2022-11-01
Supplement: s1 [file s1]

Table S1 The pH of different salt solution

| Salt solutions                  |    | pH  |
|---------------------------------|----|-----|
| CK                              |    | 7.0 |
| NaCl                            | 25 | 7.0 |
|                                 | 50 | 7.0 |
|                                 | 75 | 7.0 |
| Na <sub>2</sub> SO <sub>4</sub> | 25 | 7.0 |
|                                 | 50 | 7.0 |
|                                 | 75 | 7.0 |
| NaHCO <sub>3</sub>              | 25 | 8.0 |
|                                 | 50 | 8.3 |
|                                 | 75 | 8.8 |
| Na <sub>2</sub> CO <sub>3</sub> | 25 | 8.4 |
|                                 | 50 | 8.7 |
|                                 | 75 | 9.2 |
