# Supplementary material for: The Effect of Neutral Salt and Alkaline Stress with the Same Na+ Concentration on Root Growth of Soybean (Glycine max (L.) Merr.) Seedlings
Source: MDPI journal article supplement (doi:10.3390/agronomy12112708), 2022-11-01
Supplement: s1 [file s1]

Archive with 4 entries (4 files):
- Figure S1 RAPD polymorphism of HH49 seedling roots treated with different salt stress under SA stress were amplified using Random primer. .pdf
- Figure S2 RAPD polymorphism of HN95 seedling roots treated with different salt stress under SA stress were amplified using Random primer.pdf
- Table S1 The pH of different salt solution.pdf
- Table S2 Primer list.pdf
