# Supplementary material for: The Effect of Neutral Salt and Alkaline Stress with the Same Na+ Concentration on Root Growth of Soybean (Glycine max (L.) Merr.) Seedlings
Source: MDPI journal article supplement (doi:10.3390/agronomy12112708), 2022-11-01
Supplement: s1 [file s1 › Figure S2 RAPD polymorphism of HN95 seedling roots treated with different salt stress under SA stress were amplified using Random primer.pdf]

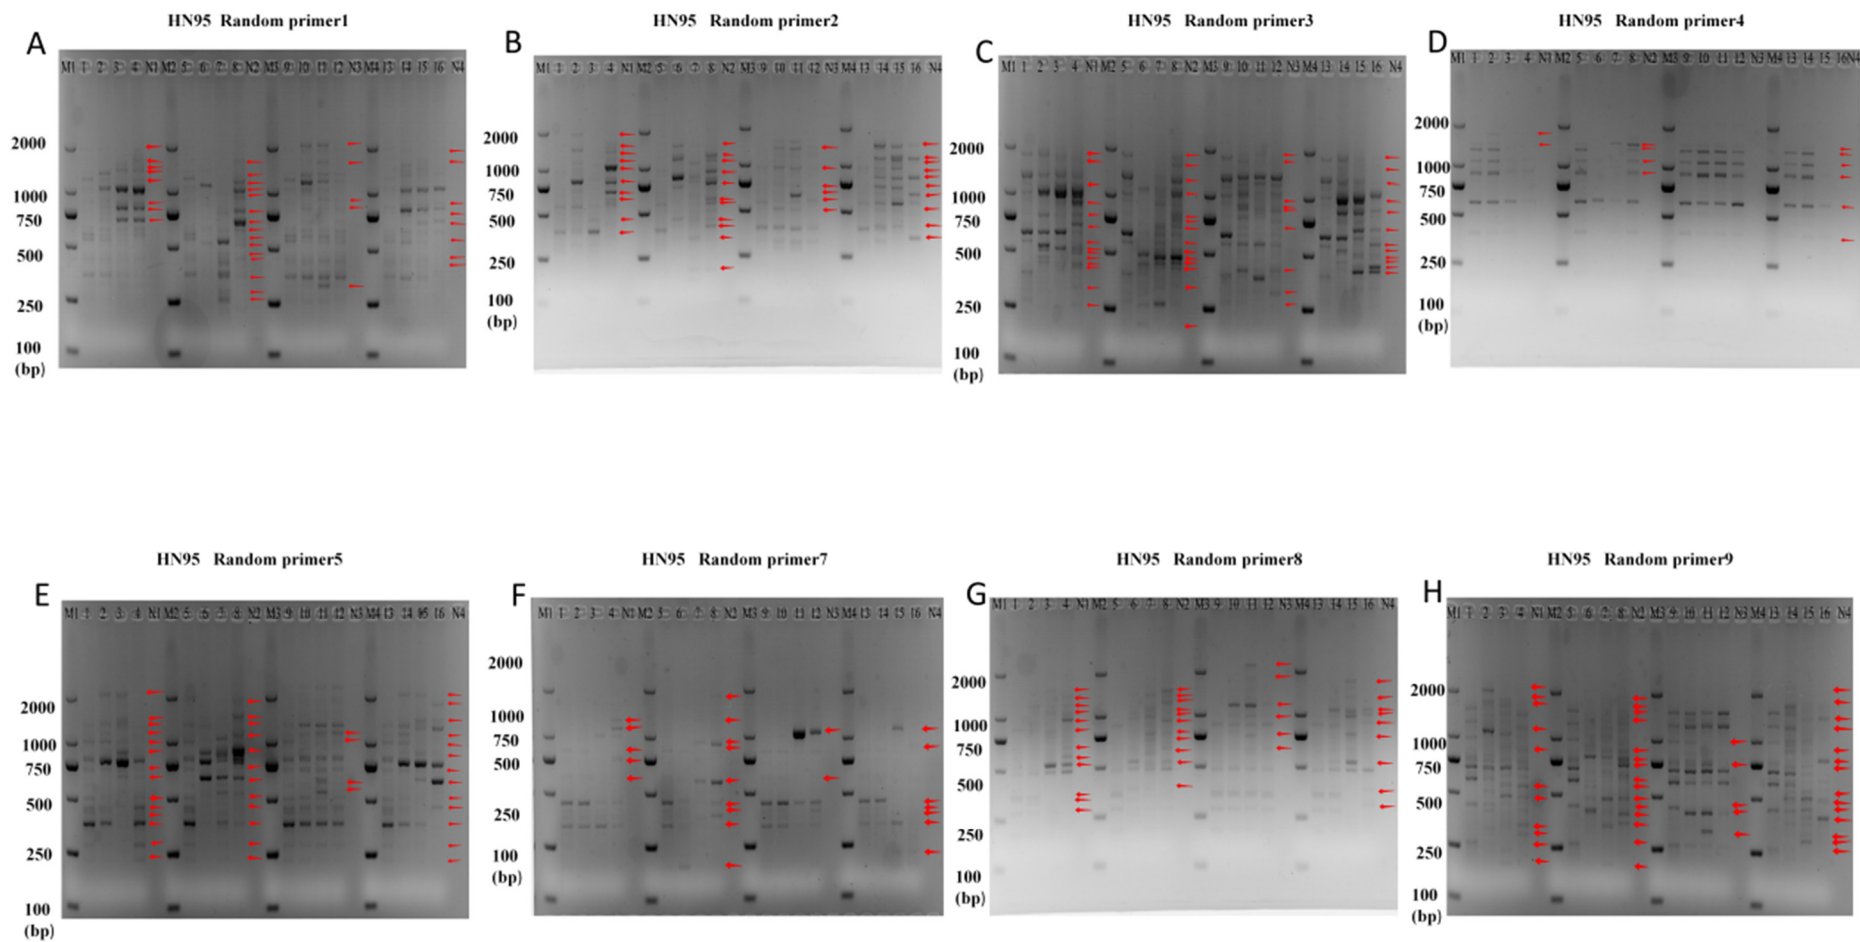

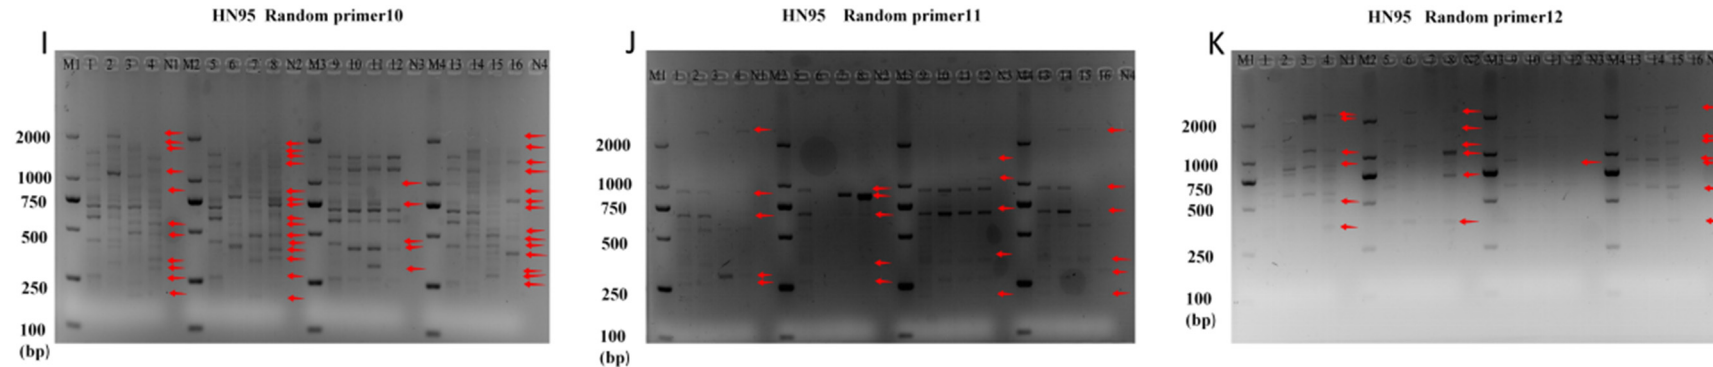

**Figure S2 RAPD polymorphism of HN95 seedling roots treated with different salt stress under SA stress were amplified using Random primer.** RAPD polymorphism were amplified using Random primer 1 (A), Random primer 2 (B), Random primer 3 (C), Random primer 4 (D), Random primer 5 (E), Random primer 7 (F), Random primer 8 (G), Random primer 9 (H), Random primer 10 (I), Random primer 11 (J) and Random primer 12 (K). The red arrow indicates RAPD polymorphism relative to the control. In (A)-(K), M1, M2, M3 and M4 were represents DL2000 marker; 1, 5, 9 and 13 represent the control; 2-4 represent 25mM, 50mM and 75mM Na<sup>+</sup> in the form of NaCl, respectively; 6-8 represent 25mM, 50mM and 75mM Na<sup>+</sup> in the form of NaHCO<sub>3</sub>, respectively; 10-12 represent 25mM, 50mM and 75mM Na<sup>+</sup> in the form of Na<sub>2</sub>CO<sub>3</sub>, respectively; 14-16 represent 25mM, 50mM and 75mM Na<sup>+</sup> in the form of Na<sub>2</sub>SO<sub>4</sub>, respectively; N1、N2、N3 and N4 represent negative controls without primer. For all treatments, bands were considered reproducible and were used for polymorphism analysis when simultaneously detected in at least two experimental replicates. Data are expressed as means  $\pm$  SD. N=3 replicates, each consisting of an average of 2 individual plants, and each biological replicates with 3 technical assay.
