# Supplementary material for: The Effect of Neutral Salt and Alkaline Stress with the Same Na+ Concentration on Root Growth of Soybean (Glycine max (L.) Merr.) Seedlings
Source: MDPI journal article supplement (doi:10.3390/agronomy12112708), 2022-11-01
Supplement: s1 [file s1 › Table S2 Primer list.pdf]

Table S2 Primer list

| Gene name         | Gene ID      | Forward primer (5'-3')   | Reverse primer (5'-3')   | Description                                                                                                                                                       |
|-------------------|--------------|--------------------------|--------------------------|-------------------------------------------------------------------------------------------------------------------------------------------------------------------|
| Tubulin A         | NM_001250372 | AGGTCGGAAACTCCTGCTGG     | AAGGTGTTGAAGGCGTCGTG     | Housekeeping genes. Encodes microtubule protein                                                                                                                   |
| Actin             | NM_001289231 | CGGTGGTTCTATCTTGGCATC    | GTCTTTCGCTTCAATAACCCTA   | Housekeeping genes. Encodes actin protein                                                                                                                         |
| <i>RBR1</i>       | XM_006598024 | ACCGTTTAAATGGCAACCGGAAG  | TCAATGGTGCACCTGATGATGATG | Encodes a retinoblastoma homologue RETINOBLASTOMA-RELATED protein (RBR or RBR1), involved in G1/S transition of mitotic cell cycle                                |
| <i>E2Fa</i>       | XM_006575228 | ATGACGGAAATGGTTCCTGCT    | TCAGAGAATGCATGAGAAGAGAGC | Member of the E2F transcription factors, (cell cycle genes), key components of the cyclin D/retinoblastoma/E2F pathway, positive regulation of meiotic cell cycle |
| <i>HISTONE H4</i> | XM_003551244 | TGCCATGGATGTGGTTTATGCG   | ACCAATGTCTTATCCTGCAACCC  | Encodes a histone 4 protein, regulation of cell cycle                                                                                                             |
| <i>CYCB1;1</i>    | NM_001250889 | CTGAGGAGCAACTAAGGGATTGCG | TGCCCTAAGCTTACTTCCTGGTG  | Cyclin-dependent protein kinase CYCB1;1. Functions as an effector of growth control at G2/M.                                                                      |
| <i>CDKA;1</i>     | NM_001253087 | TTGTTAGGTTGCAGGATGTAGTGC | GCCGCGGATCTTTCACAAACTC   | A-type cyclin-dependent kinase, regulation of cell cycle G1/S phase transition                                                                                    |
| <i>WEE1</i>       | NM_001250254 | GCCTGGTCATTTCGTTGCAACTTC | TTTAGCAGAAGGCCGCTTCACC   | Protein kinase that negatively regulates the entry into mitosis.                                                                                                  |
| Random Primer 1   |              | CTGGCGAACT               |                          | For RAPD analysis                                                                                                                                                 |
| Random Primer 2   |              | TCCGATGCTG               |                          | For RAPD analysis                                                                                                                                                 |

|                  |  |            |  |                   |
|------------------|--|------------|--|-------------------|
| Random Primer 3  |  | CTGCGCTGGA |  | For RAPD analysis |
| Random Primer 4  |  | CTGAGGTCTC |  | For RAPD analysis |
| Random Primer 5  |  | CTGGGGCTGA |  | For RAPD analysis |
| Random Primer 6  |  | TCATCCGAGG |  | For RAPD analysis |
| Random Primer 7  |  | TCTCCGCCCT |  | For RAPD analysis |
| Random Primer 8  |  | GGTGGTGATG |  | For RAPD analysis |
| Random Primer 9  |  | AAAGTGCGGC |  | For RAPD analysis |
| Random Primer 10 |  | ACCTTTGCGG |  | For RAPD analysis |
| Random Primer 11 |  | AGACCCAGAG |  | For RAPD analysis |
| Random Primer 12 |  | AATGCGGGAG |  | For RAPD analysis |
